# Supplementary material for: Anti-LRP/LR specific antibody IgG1-iS18 and knock-down of LRP/LR by shRNAs rescue cells from Aβ42 induced cytotoxicity
Source: PubMed Central journal article supplement — Sci Rep. 2013 Sep 19;3:2702. doi: 10.1038/srep02702 (PMC3776967; doi:10.1038/srep02702), 2013-09-19
Supplement: srep02702-s1.pdf [file srep02702-s1.pdf]

## **Supplementary Information**

**Title: Anti-LRP/LR antibody IgG1-iS18 rescues cells from A $\beta$ <sub>42</sub> induced cytotoxicity**

**Authors: Bianca Da Costa Dias<sup>1</sup>, Katarina Jovanovic<sup>1</sup>, Danielle Gonsalves<sup>1</sup>, Kiashnee Moodley<sup>1</sup>, Uwe Reusch<sup>2</sup>, Stefan Knackmuss<sup>2</sup>, Clement Penny<sup>3</sup>, Marc S. Weinberg<sup>4</sup>, Melvyn Little<sup>2</sup> & Stefan Weiss<sup>1\*</sup>**

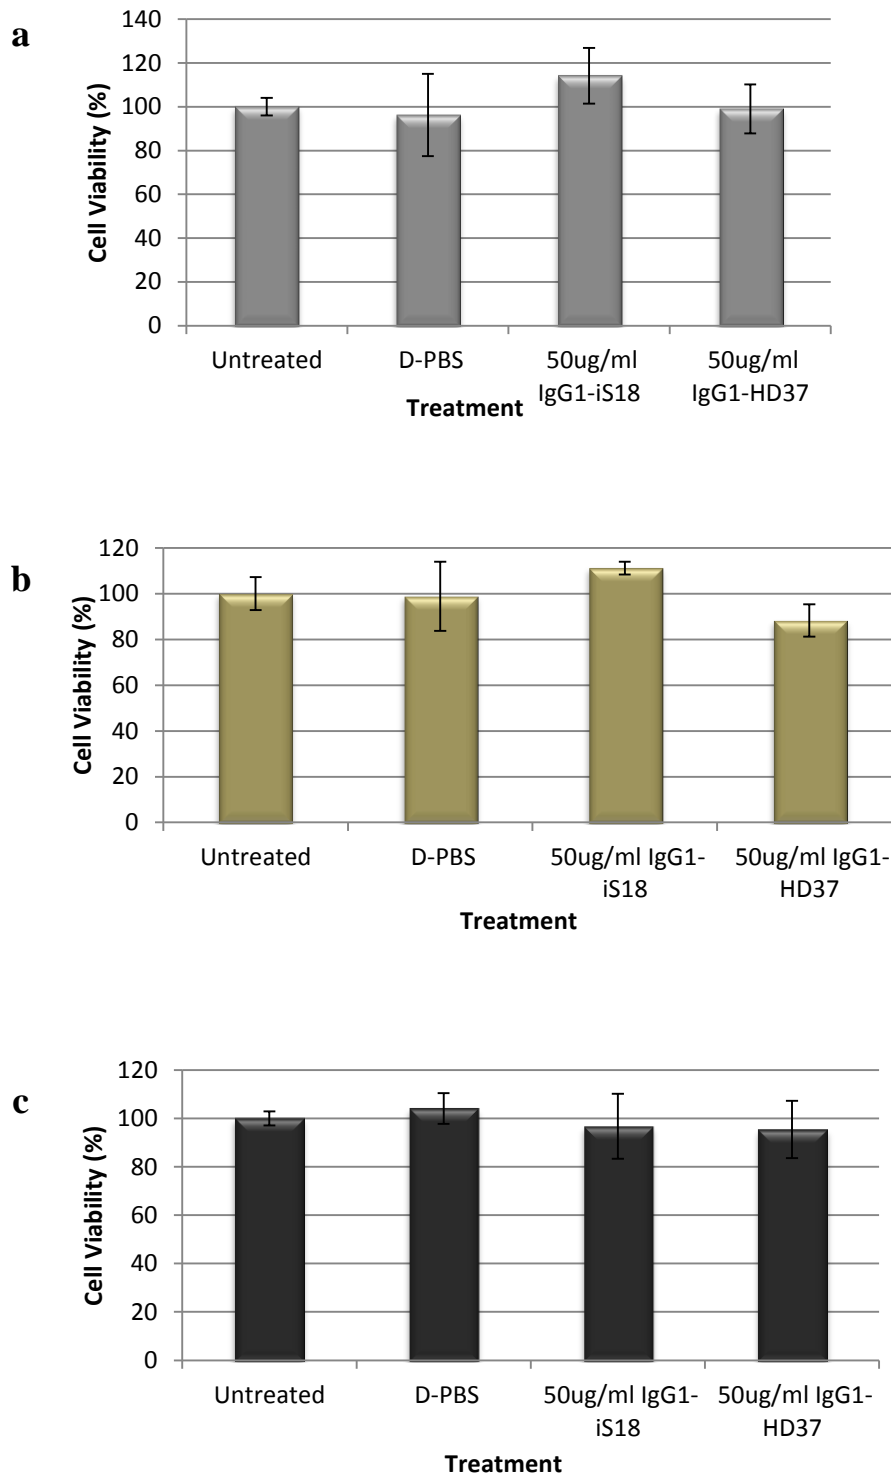

**Figure S1| The effects of Antibody treatment on cellular viability.** Cellular viability as determined by (3-(4,5-dimethylthiazol-2-yl)-2,5-diphenyltetrazolium bromide (MTT) (1 mg/ml) assay was assessed in HEK293FT cells (**a**), N2a cells (**b**) and SHSY5Y cells (**c**) post 48h incubation in the absence of antibody, in the presence of Dulbecco's Phosphate Buffered Saline (D-PBS) (antibody carrier) or either 50 $\mu$ g/ml IgG1-iS18 or IgG1-HD37. The no antibody control was set to 100%. Error bars represent sd. n=3, p>0.05; Student's *t*-test.

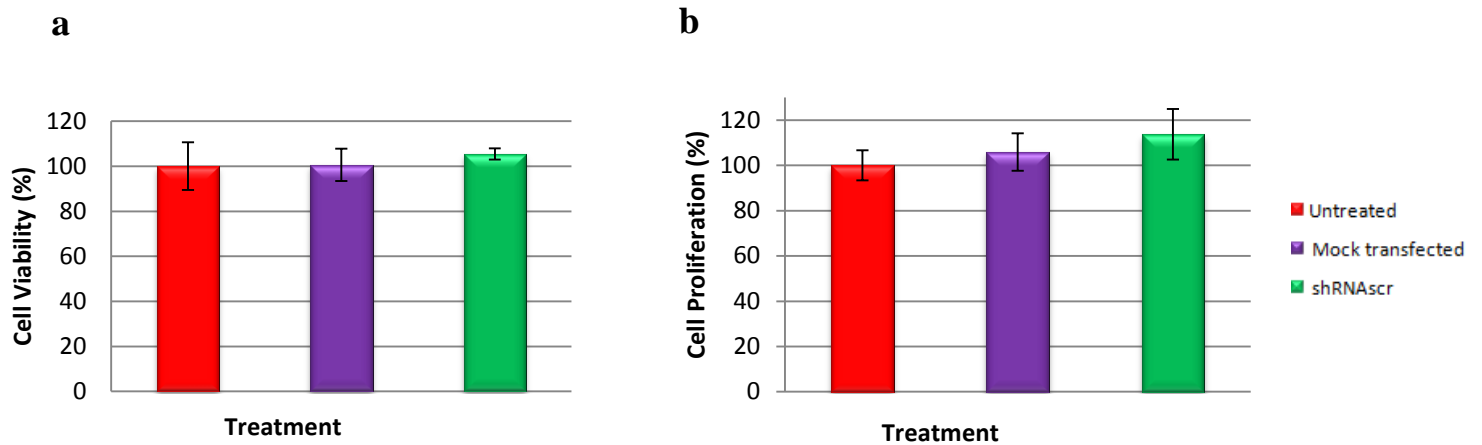

**Figure S2| Cellular effects of mock and shRNA scr-transfection of HEK293 cells.** HEK293 cells were either untreated (non-transfected), transfected with the scrambled shRNA control (shRNA scr) or mock-transfected (in which the *TransIT*®-LT1 (Mirus) transfection reagent was administered to cells in the absence of a plasmid). The cellular effects of the transfection procedure and shRNA scr were assessed 72h post transfection by both MTT (**a**) and BrdU assays (**b**), to evaluate the consequences thereof on cell viability and proliferation, respectively. Error bars represent sd. n=3, p>0.05; Student's *t*-test
